# Supplementary material
Source: PubMed Central journal article supplement (PMC2724240)

S1

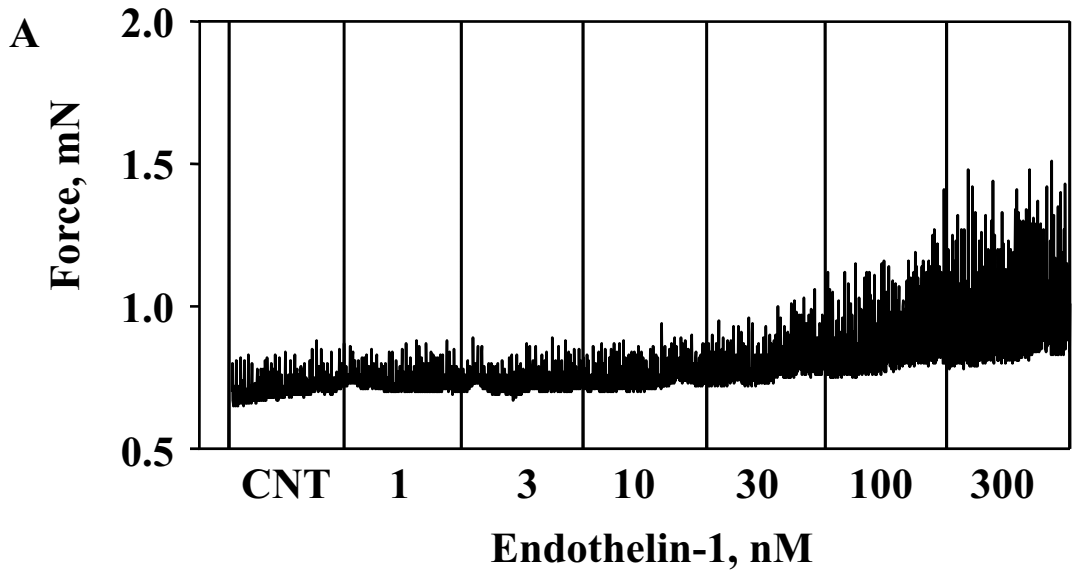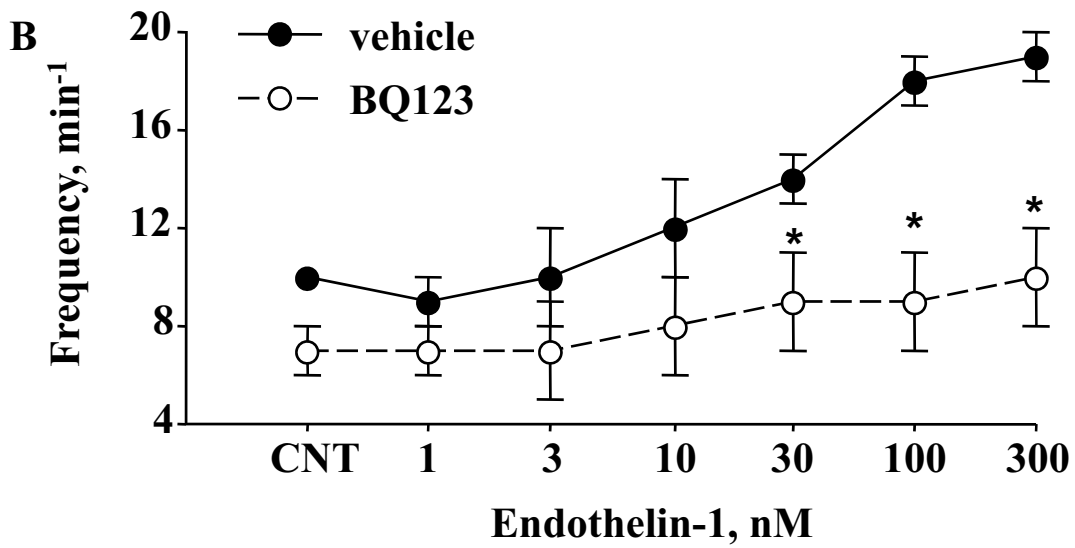

Supplement: 91029.2008_1.pdf [file 91029.2008_1.pdf]

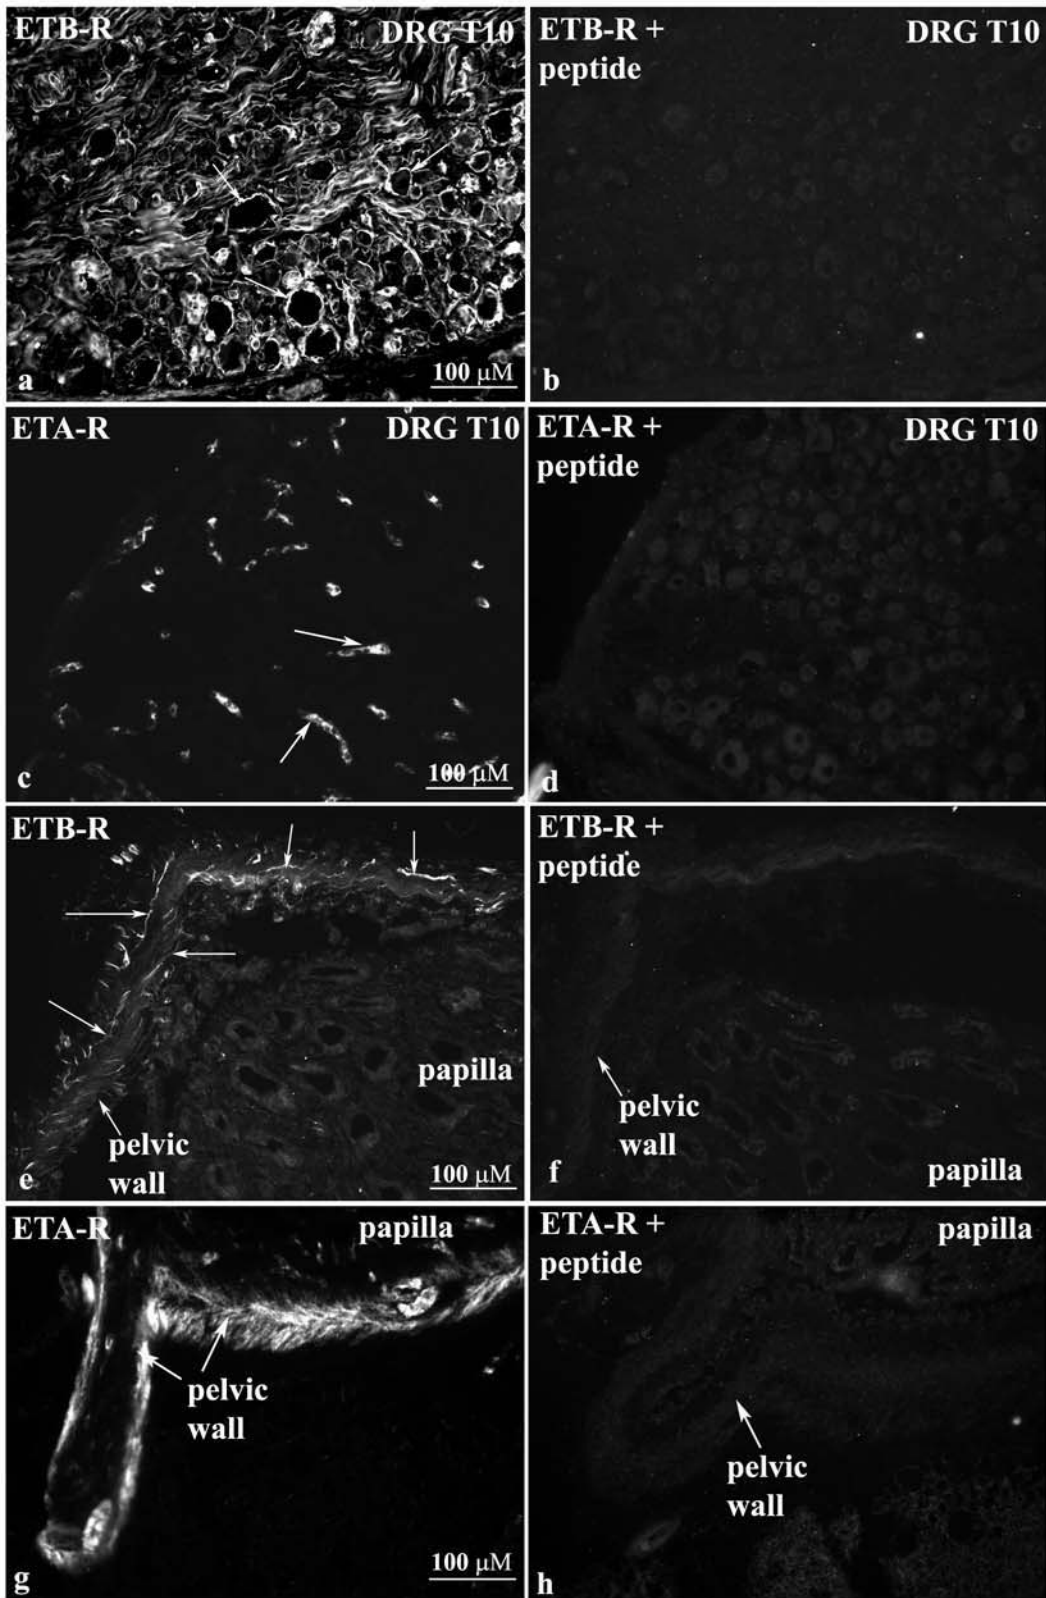

Supplement: 91029.2008_2.pdf [file 91029.2008_2.pdf]
